# Supplementary material for: Prognostic Impact of Sarcopenia’s Occurrence during Radiotherapy in Oropharyngeal Cancer Patients
Source: MDPI journal article supplement (doi:10.3390/cancers15030723), 2023-01-24
Supplement: s1 [file s1]

# Supplementary Material: Prognostic Impact of Sarcopenia's Occurrence During Radiotherapy in Oropharyngeal Cancer Patients

Luca Bergamaschi, Giulia Marvaso, Mattia Zaffaroni, Maria Giulia Vincini, Oriana D'Ecclesiis, Stefania Volpe, Annamaria Ferrari, Stefano Filippo Zorzi, Maria Cossu Rocca, Annarita Sabbatini, Giulia Cannillo, Emanuela Zagallo, Anna Starzyńska, Mohssen Ansarin, Federica Cattani, Sara Gandini, Roberto Orecchia, Daniela Alterio and Barbara A. Jereczek-Fossa

## 1. Sarcopenic condition at baseline based on CSA-MM.

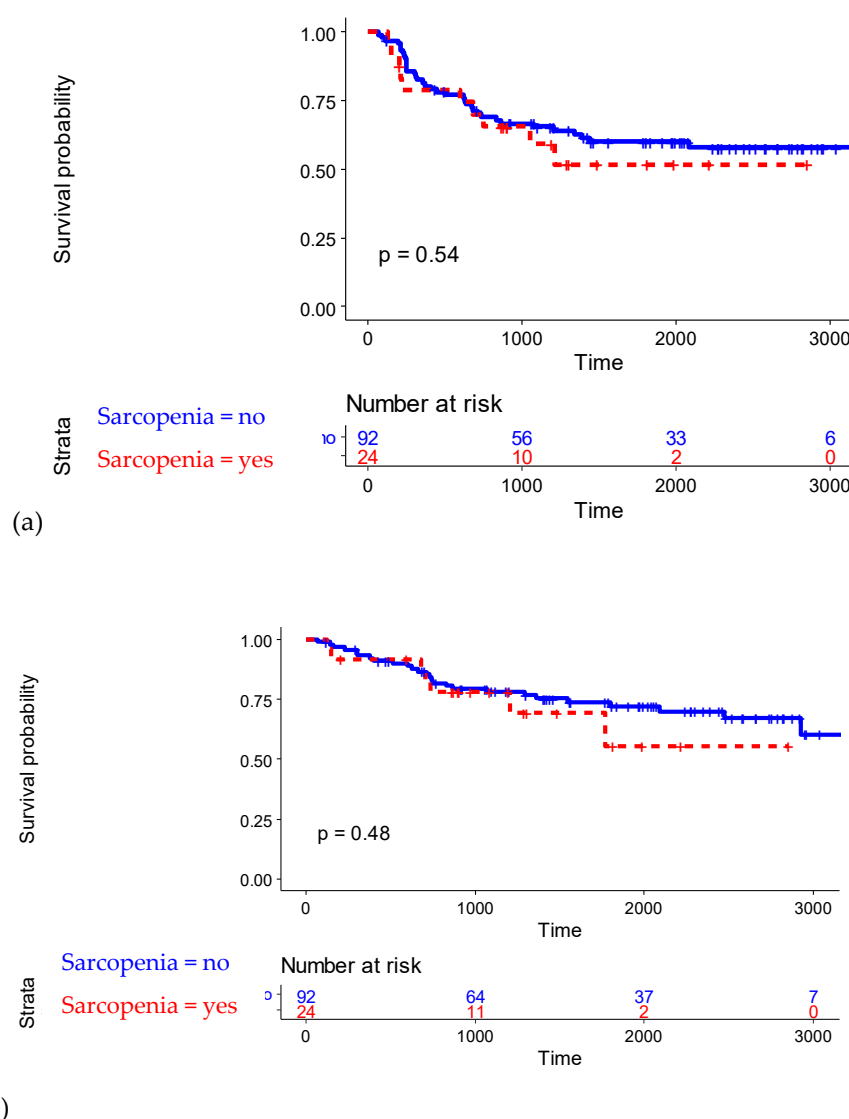

**Figure S1.** KM curves for PFS (a) and OS (b) of sarcopenic patients and not at baseline, based on MM-CSA and the formula validated by Prado et al.[47].

**Table S1.** Sarcopenic condition at baseline and associations with patient characteristics.

| Variable                     | Overall<br>( <i>n</i> = 116) | Sarcopenic Patients at<br>Baseline<br>( <i>n</i> = 24, 20.7%) | Non Sarcopenic Patients<br>at Baseline<br>( <i>n</i> = 92, 79.3%) | <i>p</i> -value |
|------------------------------|------------------------------|---------------------------------------------------------------|-------------------------------------------------------------------|-----------------|
| Age at RT, median (IQR)      | 60 (53–67)                   | 60.5 (54.2–67.5)                                              | 60 (53–66.2)                                                      | 0.83            |
| Sex                          |                              |                                                               |                                                                   |                 |
| Female, <i>n</i> (%)         | 35 (30.2)                    | 0 (0)                                                         | 35 (38)                                                           | 0.0008          |
| Male, <i>n</i> (%)           | 81 (69.8)                    | 24 (100)                                                      | 57 (62)                                                           |                 |
| Stage                        |                              |                                                               |                                                                   |                 |
| I, <i>n</i> (%)              | 1 (0.9)                      | 0 (0)                                                         | 1 (1.1)                                                           | 0.70            |
| II, <i>n</i> (%)             | 4 (3.4)                      | 0 (0)                                                         | 4 (4.3)                                                           |                 |
| III, <i>n</i> (%)            | 23 (19.8)                    | 4 (16.7)                                                      | 19 (20.6)                                                         |                 |
| IV A, <i>n</i> (%)           | 75 (64.6)                    | 18 (75)                                                       | 57 (61.9)                                                         |                 |
| IV B, <i>n</i> (%)           | 13 (11.3)                    | 2 (8.3)                                                       | 11 (12.1)                                                         |                 |
| Smoking history              |                              |                                                               |                                                                   |                 |
| Yes, <i>n</i> (%)            | 64 (55.2)                    | 11 (45.8)                                                     | 53 (57.6)                                                         | 0.06            |
| No, <i>n</i> (%)             | 33 (28.4)                    | 12 (50.0)                                                     | 21 (22.8)                                                         |                 |
| Missing, <i>n</i> (%)        | 19 (16.4)                    | 1 (4.2)                                                       | 18 (19.6)                                                         |                 |
| Alcohol history              |                              |                                                               |                                                                   |                 |
| Yes, <i>n</i> (%)            | 48 (41.4)                    | 14 (58.3)                                                     | 34 (36.9)                                                         | 0.35            |
| No, <i>n</i> (%)             | 43 (37.1)                    | 8 (33.3)                                                      | 35 (38.0)                                                         |                 |
| Missing, <i>n</i> (%)        | 25 (21.5)                    | 2 (8.4)                                                       | 23 (25.1)                                                         |                 |
| HPV/p16 status               |                              |                                                               |                                                                   |                 |
| Negative, <i>n</i> (%)       | 7 (6.0)                      | 4 (16.7)                                                      | 3 (3.3)                                                           | 0.04            |
| Positive, <i>n</i> (%)       | 86 (74.1)                    | 17 (70.8)                                                     | 69 (75)                                                           |                 |
| Missing, <i>n</i> (%)        | 23 (19.9)                    | 3 (12.5)                                                      | 20 (21.7)                                                         |                 |
| KPS                          |                              |                                                               |                                                                   |                 |
| <100, <i>n</i> (%)           | 20 (17.2)                    | 6 (25)                                                        | 14 (15.2)                                                         | 0.37            |
| =100, <i>n</i> (%)           | 96 (82.8)                    | 18 (75)                                                       | 78 (84.8)                                                         |                 |
| Therapy                      |                              |                                                               |                                                                   |                 |
| RT, <i>n</i> (%)             | 11 (9.5)                     | 3 (12.5)                                                      | 8 (8.7)                                                           | 0.69            |
| CRT, <i>n</i> (%)            | 105 (90.5)                   | 21 (87.5)                                                     | 84 (91.3)                                                         |                 |
| NLR                          |                              |                                                               |                                                                   |                 |
| <3                           | 50 (43.1)                    | 6 (25)                                                        | 44 (47.8)                                                         | 0.05            |
| ≥3                           | 62 (56.9)                    | 18 (75)                                                       | 44 (52.2)                                                         |                 |
| Nasogastric tube             |                              |                                                               |                                                                   |                 |
| Yes                          | 14 (12.1)                    | 24 (100)                                                      | 78 (84.8)                                                         | 0.06            |
| No                           | 102 (87.9)                   | 0 (0)                                                         | 14 (15.2)                                                         |                 |
| PEG                          |                              |                                                               |                                                                   |                 |
| Yes                          | 12 (10.3)                    | 19 (79.2)                                                     | 85 (92.4)                                                         | 0.07            |
| No                           | 104 (89.7)                   | 5 (20.8)                                                      | 7 (7.6)                                                           |                 |
| Hb at baseline, median (IQR) | 14.2 (13.2–15.3)             | 14.1 (13.5–15.0)                                              | 14.2 (13.0–15.4)                                                  | 0.98            |

**Table S2.** Results of multivariable analysis for PFS and OS.

| Variable               | PFS              |                 | OS                |                 |
|------------------------|------------------|-----------------|-------------------|-----------------|
|                        | HR (CI 95%)      | <i>p</i> -value | HR (CI 95%)       | <i>p</i> -value |
| Sarcopenia at baseline |                  |                 |                   |                 |
| Yes vs. No             | 0.86 (0.38–1.94) | 0.72            | 0.62 (0.20–1.98)  | 0.42            |
| Sex                    |                  |                 |                   |                 |
| M vs. F                | 5.25 (1.97–14.0) | 0.0009          | 11.5 (2.64–49.9), | 0.001           |
| KPS                    |                  |                 |                   |                 |
| <100 vs 100            | 2.79 (1.28–6.07) | 0.01            | 6.20 (2.14–18.0)  | 0.0008          |
| Nasogastric tube       |                  |                 |                   |                 |
| Yes vs. No             | 2.20 (0.97–4.97) | 0.057           | 2.69 (1.06–6.86)  | 0.04            |
| Hb at baseline         |                  |                 |                   |                 |
| Continuous variable    | 0.80 (0.64–0.99) | 0.045           | 0.71 (0.54–0.91)  | 0.008           |
| PEG                    |                  |                 |                   |                 |
| Yes vs. No             | 2.90 (1.19–6.89) | 0.02            | -                 |                 |
| NLR at baseline        |                  |                 |                   |                 |
| ≥3 vs. <3              | -                |                 | 4.60 (1.72–12.3)  | 0.002           |
| Alcohol                |                  |                 |                   |                 |
| Yes vs. No             | -                |                 | 5.66 (1.52–21.1)  | 0.01            |

## 2. Sarcopenia onset at 50 Gy based on CSA-MM

**Table S3.** Sarcopenic onset during RT and associations with patients characteristics.

| Variable                        | Overall<br>( <i>n</i> = 92) | Sarcopenic<br>Patients at 50 Gy<br>(Not at Baseline)<br>( <i>n</i> = 16, 17.4%) | Never Sarcopenic<br>Patients<br>( <i>n</i> = 69, 82.6%) | <i>p</i> -value |
|---------------------------------|-----------------------------|---------------------------------------------------------------------------------|---------------------------------------------------------|-----------------|
| Age at RT,<br>median (IQR)      | 60 (53–66.2)                | 61.5 (51.5–65.2)                                                                | 60 (53–66)                                              | 0.90            |
| Sex                             |                             |                                                                                 |                                                         |                 |
| Female, <i>n</i> (%)            | 35 (38)                     | 1 (6.2)                                                                         | 32 (46.4)                                               | 0.007           |
| Male, <i>n</i> (%)              | 57 (62.0)                   | 15 (93.8)                                                                       | 37 (53.6)                                               |                 |
| Stage                           |                             |                                                                                 |                                                         |                 |
| I, <i>n</i> (%)                 | 1 (1.1)                     | 0 (0)                                                                           | 1 (1.4)                                                 | 0.54            |
| II, <i>n</i> (%)                | 4 (4.3)                     | 1 (6.2)                                                                         | 3 (4.3)                                                 |                 |
| III, <i>n</i> (%)               | 19 (20.6)                   | 5 (31.2)                                                                        | 14 (20.3)                                               |                 |
| IV A, <i>n</i> (%)              | 57 (61.9)                   | 8 (50)                                                                          | 44 (63.8)                                               |                 |
| IV B, <i>n</i> (%)              | 11 (12.1)                   | 2 (12.6)                                                                        | 7 (10.2)                                                |                 |
| Smoking status                  |                             |                                                                                 |                                                         |                 |
| Yes, <i>n</i> (%)               | 53 (57.6)                   | 7 (43.7)                                                                        | 44 (63.8)                                               | 0.22            |
| No, <i>n</i> (%)                | 21 (22.8)                   | 4 (25)                                                                          | 15 (21.7)                                               |                 |
| Missing, <i>n</i> (%)           | 18 (19.6)                   | 5 (31.3)                                                                        | 10 (14.5)                                               |                 |
| Alcohol status                  |                             |                                                                                 |                                                         |                 |
| Yes, <i>n</i> (%)               | 34 (36.9)                   | 9 (56.2)                                                                        | 24 (34.8)                                               | 0.06            |
| No, <i>n</i> (%)                | 35 (38.0)                   | 2 (12.5)                                                                        | 31 (44.9)                                               |                 |
| Missing, <i>n</i> (%)           | 23 (24.9)                   | 5 (31.3)                                                                        | 14 (20.3)                                               |                 |
| HPV/p16 status 16               |                             |                                                                                 |                                                         |                 |
| Negative, <i>n</i> (%)          | 3 (3.3)                     | 3 (18.7)                                                                        | 0 (0)                                                   | 0.007           |
| Positive, <i>n</i> (%)          | 69 (75)                     | 10 (62.5)                                                                       | 54 (78.3)                                               |                 |
| Missing, <i>n</i> (%)           | 20 (21.7)                   | 3 (18.8)                                                                        | 15 (21.7)                                               |                 |
| KPS                             |                             |                                                                                 |                                                         |                 |
| <100, <i>n</i> (%)              | 14 (15.2)                   | 1 (6.2)                                                                         | 12 (17.4)                                               | 0.46            |
| =100, <i>n</i> (%)              | 78 (84.8)                   | 15 (93.8)                                                                       | 57 (82.6)                                               |                 |
| Therapy                         |                             |                                                                                 |                                                         |                 |
| RT, <i>n</i> (%)                | 8 (8.7)                     | 0 (0)                                                                           | 8 (11.6)                                                | 0.21            |
| CRT, <i>n</i> (%)               | 84 (91.3)                   | 16 (100)                                                                        | 61 (88.4)                                               |                 |
| NLR                             |                             |                                                                                 |                                                         |                 |
| <3                              | 44 (47.8)                   | 12 (75)                                                                         | 29 (42.0)                                               | 0.05            |
| ≥3                              | 44 (47.8)                   | 4 (25)                                                                          | 36 (52.2)                                               |                 |
| Missing                         | 4 (4.3)                     | 0 (0)                                                                           | 4 (5.8)                                                 |                 |
| Nasogastric tube                |                             |                                                                                 |                                                         |                 |
| Yes                             | 14 (15.2)                   | 2 (12.5)                                                                        | 12 (17.4)                                               | 0.74            |
| No                              | 78 (84.8)                   | 14 (87.5)                                                                       | 57 (82.6)                                               |                 |
| PEG                             |                             |                                                                                 |                                                         |                 |
| Yes                             | 7 (7.6)                     | 0 (0)                                                                           | 6 (8.7)                                                 | 0.35            |
| No                              | 85 (92.4)                   | 16 (100)                                                                        | 63 (91.3)                                               |                 |
| Hb at baseline,<br>median (IQR) | 14.2 (13.05–15.4)           | 15.1 (12.1–15.6)                                                                | 14.1 (13.1–15.4)                                        | 0.41            |
| CCI, median (IQR)               | 2 (2–3)                     | 2(2–2)                                                                          | 2 (2–3)                                                 | 0.42            |

**Table S4.** Sarcopenic onset during RT and associations with blood parameters, both at baseline and at the end of RT.

|           | Variable  | Sarcopenic Patients at 50 Gy<br>( <i>n</i> = 16, 17.4%)<br>Median (IQR) | Never Sarcopenic Patients<br>( <i>n</i> = 69, 82.6%)<br>Median (IQR) | <i>p</i> -value |
|-----------|-----------|-------------------------------------------------------------------------|----------------------------------------------------------------------|-----------------|
| Baseline  | NLR       | 2.61 (2.44–3.07)                                                        | 3.21 (2.14–3.91)                                                     | 0.22            |
|           | Hb        | 14.1 (13.5–15.0)                                                        | 14.2 (13.0–15.4)                                                     | 0.98            |
|           | PLR       | 132.5 (120.2–137.9)                                                     | 163.9 (120.3–194.6)                                                  | 0.11            |
|           | Platelets | 212.0 (169.7–240.5)                                                     | 234.0 (199.0–275.0)                                                  | 0.12            |
|           | Monocytes | 0.61 (0.53–0.74)                                                        | 0.59 (0.43–0.78)                                                     | 0.41            |
| End of RT | NLR       | 9.51 (7.75–14.7)                                                        | 12.6 (7.72–17.0)                                                     | 0.56            |
|           | Hb        | 11.9 (10.8–12.4)                                                        | 11.9 (11.3–12.9)                                                     | 0.41            |
|           | PLR       | 485.9 (342.7–613.1)                                                     | 582.0 (441.2–895.1)                                                  | 0.08            |
|           | Platelets | 164.5 (156.7–200.5)                                                     | 214.0 (153.5–262.0)                                                  | 0.05            |
|           | Monocytes | 0.62 (0.47–0.68)                                                        | 0.52 (0.40–0.73)                                                     | 0.58            |

**Table S5.** Sarcopenic onset during RT and associations activation of nutritional counseling during RT.

| Variable                          | Sarcopenia (yes)<br>( <i>n</i> = 16) | Sarcopenia (no)<br>( <i>n</i> = 69) | <i>p</i> -value |
|-----------------------------------|--------------------------------------|-------------------------------------|-----------------|
|                                   |                                      |                                     | 0.75            |
| Counseling (yes) ( <i>n</i> = 21) | 3 (14.3)                             | 18 (85.7)                           |                 |
| Counseling (no) ( <i>n</i> = 64)  | 13 (20.3)                            | 51 (79.7)                           |                 |

### 3. Sarcopenia onset at 50 Gy based on CSA-C3

**Table S6.** Sarcopenic onset during RT and associations with blood parameters, both at baseline and at the end of RT.

| Variable                | Overall<br>( <i>n</i> = 108) | Sarcopenic Patients at<br>50 Gy (Not at Baseline)<br>( <i>n</i> = 14, 13.0%) | Never Sarcopenic Patients<br>( <i>n</i> = 94, 87.0%) | <i>p</i> -value |
|-------------------------|------------------------------|------------------------------------------------------------------------------|------------------------------------------------------|-----------------|
| Age at RT, median (IQR) | 60 (53–67)                   | 70.5 (64.5–76.7)                                                             | 59 (52–64)                                           | <0.001          |
| Sex                     |                              |                                                                              |                                                      |                 |
| Female, <i>n</i> (%)    | 33 (30.5)                    | 2 (14.3)                                                                     | 31 (33.0)                                            | 0.20            |
| Male, <i>n</i> (%)      | 75 (69.5)                    | 12 (85.7)                                                                    | 63 (67.0)                                            |                 |
| Stage                   |                              |                                                                              |                                                      |                 |
| I, <i>n</i> (%)         | 1 (0.9)                      | 0 (0)                                                                        | 1 (1.1)                                              | 0.74            |
| II, <i>n</i> (%)        | 4 (3.7)                      | 1 (7.1)                                                                      | 3 (3.2)                                              |                 |
| III, <i>n</i> (%)       | 23 (21.3)                    | 2 (14.3)                                                                     | 21 (22.3)                                            |                 |
| IV A, <i>n</i> (%)      | 69 (63.9)                    | 10 (71.5)                                                                    | 59 (62.8)                                            |                 |
| IV B, <i>n</i> (%)      | 11 (10.2)                    | 1 (7.1)                                                                      | 10 (89.4)                                            |                 |
| Smoking status          |                              |                                                                              |                                                      |                 |
| Yes, <i>n</i> (%)       | 62 (57.4)                    | 8 (57.1)                                                                     | 53 (56.4)                                            | 0.99            |
| No, <i>n</i> (%)        | 31 (28.7)                    | 4 (28.6)                                                                     | 27 (28.7)                                            |                 |
| Missing, <i>n</i> (%)   | 16 (13.9)                    | 2 (14.3)                                                                     | 14 (14.9)                                            |                 |
| Alcohol status          |                              |                                                                              |                                                      |                 |
| Yes, <i>n</i> (%)       | 47 (43.5)                    | 6 (42.8)                                                                     | 41 (43.6)                                            | 0.64            |
| No, <i>n</i> (%)        | 40 (37.0)                    | 4 (28.6)                                                                     | 36 (38.3)                                            |                 |
| Missing, <i>n</i> (%)   | 21 (19.5)                    | 4 (28.6)                                                                     | 17 (18.1)                                            |                 |
| HPV status 16           |                              |                                                                              |                                                      |                 |
| Negative, <i>n</i> (%)  | 6 (5.5)                      | 1 (7.1)                                                                      | 5 (5.3)                                              | 0.22            |
| Positive, <i>n</i> (%)  | 81 (75.0)                    | 8 (57.1)                                                                     | 73 (77.6)                                            |                 |
| Missing, <i>n</i> (%)   | 21 (19.5)                    | 5 (64.2)                                                                     | 16 (17.1)                                            |                 |
| KPS                     |                              |                                                                              |                                                      | 0.23            |

|                              |                  |                  |                  |      |
|------------------------------|------------------|------------------|------------------|------|
| <100, <i>n</i> (%)           | 18 (16.7)        | 4 (28.6)         | 14 (14.9)        |      |
| =100, <i>n</i> (%)           | 90 (83.3)        | 10 (71.4)        | 80 (85.1)        |      |
| Therapy                      |                  |                  |                  |      |
| RT, <i>n</i> (%)             | 10 (9.3)         | 3 (21.4)         | 7 (7.5)          | 0.12 |
| CRT, <i>n</i> (%)            | 98 (90.7)        | 11 (78.6)        | 87 (92.5)        |      |
| NLR                          |                  |                  |                  |      |
| <3                           | 47 (43.5)        | 4 (28.6)         | 43 (45.7)        | 0.41 |
| ≥3                           | 57 (52.8)        | 9 (64.3)         | 48 (51.1)        |      |
| Missing                      | 4 (3.7)          | 1 (7.1)          | 3 (3.2)          |      |
| Nasogastric tube             |                  |                  |                  |      |
| Yes                          | 14 (13.0)        | 4 (28.6)         | 10 (10.6)        | 0.06 |
| No                           | 94 (87.0)        | 10 (71.4)        | 84 (89.4)        |      |
| PEG                          |                  |                  |                  |      |
| Yes                          | 11 (10.2)        | 3 (21.4)         | 8 (8.5)          | 0.15 |
| No                           | 97 (89.8)        | 11 (78.6)        | 86 (91.5)        |      |
| HB at baseline, median (IQR) | 14.2 (13.2–15.3) | 13.4 (12.6–14.1) | 14.5 (13.3–15.5) | 0.03 |
| CCI median (IQR)             | 2 (2–3)          | 2(2–2)           | 2 (2–3)          | 0.76 |

**Table S7.** Associations between becoming sarcopenic at 50 Gy and blood parameters collected at baseline.

|           |           | Sarcopenic Patients at 50 Gy<br>( <i>n</i> = 14, 13%)<br>Median (IQR) | Never Sarcopenic Patients<br>( <i>n</i> = 94, 87%)<br>Median (IQR) | <i>p</i> -value |
|-----------|-----------|-----------------------------------------------------------------------|--------------------------------------------------------------------|-----------------|
| Baseline  | NLR       | 3.36 (2.97–4.32)                                                      | 3.04 (2.16–3.87)                                                   | 0.08            |
|           | Hb        | 13.4 (12.6–14.1)                                                      | 14.5 (13.3–15.5)                                                   | 0.03            |
|           | PLR       | 174.3 (127.5–247.6)                                                   | 147 (121.7–192.7)                                                  | 0.28            |
|           | Platelets | 218 (169–265)                                                         | 239 (202–286)                                                      | 0.33            |
|           | Monocytes | 0.67 (0.55–0.73)                                                      | 0.61 (0.47–0.74)                                                   | 0.61            |
| End of RT | NLR       | 13.2 (10.4–16.1)                                                      | 11.6 (7.55–19.5)                                                   | 0.57            |
|           | Hb        | 12 (11.07–12.5)                                                       | 11.9 (11.1–12.8)                                                   | 0.80            |
|           | PLR       | 496.5 (424.9–1005.0)                                                  | 568.3 (427.5–938.4)                                                | 0.83            |
|           | Platelets | 222.5 (178.2–256.2)                                                   | 205.5 (157.0–258.5)                                                | 0.43            |
|           | Monocytes | 0.60 (0.51–0.75)                                                      | 0.54 (0.39–0.74)                                                   | 0.40            |

**Table S8.** Sarcopenic onset during RT and associations activation of nutritional counseling during RT.

| Variable                          | Sarcopenia (yes)<br>( <i>n</i> = 14) | Sarcopenia (no)<br>( <i>n</i> = 94) | <i>p</i> -value |
|-----------------------------------|--------------------------------------|-------------------------------------|-----------------|
|                                   |                                      |                                     | 0.02            |
| Counseling (yes) ( <i>n</i> = 31) | 8 (25.8)                             | 23 (79.2)                           |                 |
| Counseling (no) ( <i>n</i> = 77)  | 6 (7.8)                              | 71 (92.2)                           |                 |

**Table S9.** Results of multivariable Cox proportional hazard models related to PFS and OS (muscle loss considered as continuous variable).

| Variable                                   | MM-CSA                              |                                    | C3-CSA                              |                                    |
|--------------------------------------------|-------------------------------------|------------------------------------|-------------------------------------|------------------------------------|
|                                            | PFS<br>HR (CI 95%), <i>p</i> -value | OS<br>HR (CI 95%), <i>p</i> -value | PFS<br>HR (CI 95%), <i>p</i> -value | OS<br>HR (CI 95%), <i>p</i> -value |
| Sarcopenia at 50 Gy<br>continuous variable | 0.93 (0.87–0.99), 0.02              | 0.89 (0.82–0.96), 0.005            | 1.00 (0.94–1.06), 0.99              | 1.03 (0.95–1.11), 0.51             |
| Sex<br>M vs. F                             | 13.3 (3.43–51.3), 0.0002            | 16.9 (3.87–73.8), 0.0002           | 4.40 (1.34–14.4), 0.01              | 6.94 (1.45–33.09), 0.01            |
| KPS                                        | 3.82 (1.28–11.4), 0.02              | -                                  | -                                   | 4.34 (1.43–13.1), 0.009            |

|                                       |                         |                          |                          |                         |
|---------------------------------------|-------------------------|--------------------------|--------------------------|-------------------------|
| <100 vs. = 100                        |                         |                          |                          |                         |
| Nasogastric tube<br>Yes vs. No        | 2.69 (1.19–6.08), 0.02  | 9.69 (3.46–27.1), <0.001 | 3.18 (1.51–6.70), 0.002  | 3.77 (1.55–9.14), 0.003 |
| Hb at baseline<br>Continuous variable | 0.70 (0.55–0.91), 0.008 | 0.57 (0.41–0.77), 0.0004 | 0.70 (0.57–0.86), 0.0008 | 0.66 (0.50–0.88), 0.004 |
| NLR at baseline<br>≥3 vs. <3          | 2.26 (1.04–4.90), 0.04  | -                        | -                        | 4.05 (1.52–10.8), 0.005 |
| CCI<br>Continuous variable            | -                       | 2.57 (1.54–4.30), 0.0003 | -                        | -                       |
| Alcohol<br>Yes vs. no                 | -                       | -                        | -                        | 6.02 (1.30–27.9), 0.02  |
